# Supplementary material for: The Clinical Implications of Serum Carbohydrate Antigen 19-9 Levels in Patients with Nontuberculous Mycobacteria Pulmonary Disease
Source: Preprints.org preprint supplement (doi:10.20944/preprints202310.1876.v1), 2023-10-30
Supplement: Supplementary file 1 [file supplementary]

[Supplementary Data]

**The Clinical Implications of Serum Carbohydrate Antigen 19-9 Levels in Patients with Nontuberculous Mycobacterial Pulmonary Disease**

Daegeun Lee1, Byung Woo Jhun2

1Division of Pulmonary, Allergy and Critical Care Medicine, Chung-Ang University Gwangmyeong Hospital, Gwangmyeong, South Korea

2Division of Pulmonary and Critical Care Medicine, Department of Medicine, Samsung Medical center, Sungkyunkwan University School of Medicine, Seoul, Republic of Korea

**Supplementary Figure 1.** Analysis of the correlation between serum CA19-9 levels and ESR levels (n = 811).

**Supplementary Figure 2.** Comparison of CA 19-9 level between microbiological cure (n = 466) and failure (n = 85) groups (total n = 551)
